# Supplementary material for: Physicochemical Properties and Whey Proteomes of Camel Milk Powders Produced by Different Concentration and Dehydration Processes
Source: Foods. 2022 Mar 1;11(5):727. doi: 10.3390/foods11050727 (PMC8909633; doi:10.3390/foods11050727)
Supplement: Supplementary file 1 [file foods-11-00727-s001.zip › foods-1593985-supplementary.pdf]

## **Supplementary Materials**

Table S1. Summary of concentration and dehydration processes of camel milk.

Table S2. Proteins showing significant change after camel milk powder processing.

Table S1. Summary of concentration and dehydration processes of camel milk.

| Process                          | Concentration factor | Drying yield (%) |
|----------------------------------|----------------------|------------------|
| <b><i>Spray drying</i></b>       |                      |                  |
| Raw milk - Batch 1               |                      | 32.4             |
| Raw milk - Batch 2               |                      | 26.1             |
| Raw milk - Batch 3               |                      | 24.7             |
| Concentrated milk (SD) - Batch 1 | 1.6                  | 34.0             |
| Concentrated milk (SD) - Batch 2 | 1.6                  | 30.7             |
| Concentrated milk (SD) - Batch 3 | 1.7                  | 28.4             |
| Concentrated milk (RO) - Batch 1 | 1.7                  | 25.3             |
| Concentrated milk (RO) - Batch 2 | 1.6                  | 32.9             |
| Concentrated milk (RO) - Batch 3 | 1.6                  | 26.1             |
| <b><i>Freeze drying</i></b>      |                      |                  |
| Raw milk - Batch 1               |                      | 98.2             |
| Raw milk - Batch 2               |                      | 97.9             |
| Raw milk - Batch 3               |                      | 96.9             |
| Concentrated milk (SD) - Batch 1 | 1.6                  | 96.4             |
| Concentrated milk (SD) - Batch 2 | 1.6                  | 97.1             |
| Concentrated milk (SD) - Batch 3 | 1.7                  | 97.9             |
| Concentrated milk (RO) - Batch 1 | 1.7                  | 96.2             |
| Concentrated milk (RO) - Batch 2 | 1.6                  | 98.7             |
| Concentrated milk (RO) - Batch 3 | 1.6                  | 98.4             |

SD, spray dewatering; RO, reverse osmosis.

Table S2. Proteins showing significant change after camel milk powder processing.

| Sample | Accession  | Protein name                                | Function of protein     | Relative amount to raw milk | p value   |
|--------|------------|---------------------------------------------|-------------------------|-----------------------------|-----------|
| FR     | L0P3Z7     | $\kappa$ -Casein                            | Protein stabilization   | 134 $\pm$ 3%                | 0         |
|        | T0MII3     | $\alpha$ -2-Macroglobulin-like protein      | Enzyme inhibitor        | 134 $\pm$ 3%                | 0         |
|        | S9WDD6     | CLb domain-containing protein               | Binding protein         | 113 $\pm$ 2%                | 3.03E-06  |
|        | S9WI87     | Serum albumin                               | Cellular component      | 113 $\pm$ 2%                | 1.27E-07  |
|        | M1E4K4     | $\beta$ -Casein                             | Cellular component      | 85 $\pm$ 1%                 | 0         |
|        | S9YK74     | Perilipin                                   | Lipid storage regulator | 84 $\pm$ 3%                 | 1.25E-07  |
|        | S9XI30     | FABP domain-containing protein              | Binding protein         | 83 $\pm$ 4%                 | 6.71E-06  |
|        | S9WX48     | $\alpha$ -1-Acid glycoprotein               | Immune response         | 66 $\pm$ 6%                 | 6.86E-11  |
|        | S9Y2X0     | Platelet glycoprotein 4                     | Immune response         | 57 $\pm$ 5%                 | 0         |
| FSD    | S9X3V4     | TAF domain-containing protein               | Binding protein         | 495 $\pm$ 12%               | 0         |
|        | T0MED9     | Uncharacterized protein                     | Cellular component      | 202 $\pm$ 6%                | 0         |
|        | T0MII3     | $\alpha$ -2-Macroglobulin-like protein      | Enzyme inhibitor        | 191 $\pm$ 3%                | 0         |
|        | L0P3Z7     | $\kappa$ -Casein                            | Protein stabilization   | 191 $\pm$ 3%                | 0         |
|        | T0M781     | $\alpha$ -2-Antiplasmin isoform 2           | Enzyme inhibitor        | 187 $\pm$ 14%               | 5.742E-06 |
|        | S9XC74     | Osteopontin                                 | Cell adhesion           | 175 $\pm$ 6%                | 0         |
|        | T0M664     | Zinc- $\alpha$ -2-glycoprotein-like protein | Binding protein         | 168 $\pm$ 4%                | 0         |
|        | S9WCV2     | Sulfhydryl oxidase                          | Enzyme                  | 164 $\pm$ 8%                | 1.084E-09 |
|        | T0M5F7     | Uncharacterized protein                     | NA                      | 158 $\pm$ 7%                | 6.098E-11 |
|        | T0MGY4     | Uncharacterized protein                     | NA                      | 157 $\pm$ 9%                | 1.307E-06 |
|        | S9X4X6     | Uncharacterized protein                     | Immune response         | 151 $\pm$ 4%                | 0         |
|        | Q9GK12     | Peptidoglycan recognition protein 1         | Immune response         | 147 $\pm$ 5%                | 0         |
|        | S9Y7F6     | Cystatin domain-containing protein          | Enzyme inhibitor        | 143 $\pm$ 8%                | 6.597E-06 |
|        | A0A093HMQ3 | Growth/differentiation factor 8             | Binding protein         | 141 $\pm$ 5%                | 3.002E-13 |
|        | S9X1L5     | Lipoprotein lipase isoform 3                | Enzyme                  | 141 $\pm$ 7%                | 1.307E-06 |
|        | S9W7K0     | Uncharacterized protein                     | Immune response         | 140 $\pm$ 5%                | 2.543E-13 |
|        | S9X2H2     | Uncharacterized protein                     | Enzyme inhibitor        | 139 $\pm$ 3%                | 0         |
|        | S9YFG2     | Complement factor D                         | Enzyme                  | 136 $\pm$ 7%                | 4.506E-06 |
|        | O97944     | $\alpha$ <sub>s2</sub> -Casein              | Cellular component      | 133 $\pm$ 4%                | 5.195E-12 |

|     |            |                                                                                               |                         |           |           |
|-----|------------|-----------------------------------------------------------------------------------------------|-------------------------|-----------|-----------|
| FRO | S9X4G0     | Neutrophil gelatinase-associated lipocalin-like protein                                       | Binding protein         | 133 ± 4%  | 3.376E-12 |
|     | P15522-2   | Glycosylation-dependent cell adhesion molecule 1                                              | Cellular component      | 129 ± 4%  | 2.71E-10  |
|     | S9WPL9     | Uncharacterized protein                                                                       | Enzyme inhibitor        | 121 ± 2%  | 6.661E-15 |
|     | S9X0S2     | Uncharacterized protein                                                                       | Enzyme                  | 121 ± 4%  | 5.057E-06 |
|     | T0MIA6     | Gelsolin isoform 32                                                                           | Binding protein         | 118 ± 3%  | 3.507E-06 |
|     | T0NN97     | Uncharacterized protein                                                                       | Enzyme inhibitor        | 113 ± 2%  | 1.718E-07 |
|     | S9YK74     | Perilipin                                                                                     | Lipid storage regulator | 86 ± 3%   | 2.069E-06 |
|     | P09837     | Whey acidic protein                                                                           | Enzyme inhibitor        | 82 ± 4%   | 7.813E-07 |
|     | Q9GJW6     | Peroxidase                                                                                    | Enzyme                  | 79 ± 3%   | 3.035E-12 |
|     | S9Z0L8     | Amine oxidase                                                                                 | Enzyme                  | 78 ± 3%   | 0         |
|     | S9YTS3     | Actin, cytoplasmic 1                                                                          | Binding protein         | 76 ± 3%   | 0         |
|     | S9WX48     | $\alpha$ -1-Acid glycoprotein                                                                 | Immune response         | 75 ± 6%   | 4.174E-06 |
|     | S9WF76     | Lactadherin                                                                                   | Immune response         | 74 ± 3%   | 0         |
|     | S9X7Q1     | Lactoperoxidase                                                                               | Enzyme                  | 73 ± 5%   | 9.851E-10 |
|     | S9WSX8     | Legumain                                                                                      | Enzyme                  | 73 ± 4%   | 2.189E-11 |
|     | A0A2U2AHL8 | Ribonuclease HII                                                                              | Binding protein         | 65 ± 4%   | 1.254E-13 |
|     | S9X2V0     | UDP-Gal: $\beta$ GlcNAc $\beta$ 1,4-galactosyltransferase 1, membrane-bound form-like protein | Enzyme                  | 61 ± 7%   | 3.035E-12 |
|     | S9YK31     | Peptidyl-prolyl cis-trans isomerase                                                           | Enzyme                  | 46 ± 11%  | 5.884E-12 |
|     | K7DXB9     | $\alpha$ <sub>s1</sub> -Casein                                                                | Cellular component      | 40 ± 13%  | 7.782E-13 |
|     | S9X9X0     | Vitelline membrane outer layer protein 1-like protein                                         | Cellular component      | 563 ± 15% | 0         |
|     | T0MII3     | $\alpha$ -2-Macroglobulin-like protein                                                        | Enzyme inhibitor        | 333 ± 4%  | 0         |
|     | T0MED9     | Uncharacterized protein                                                                       | Cellular component      | 201 ± 9%  | 2.273E-14 |
|     | S9X3V4     | TAF domain-containing protein                                                                 | Binding protein         | 200 ± 12% | 2.836E-07 |
|     | S9XGH7     | Polyubiquitin-B                                                                               | Binding protein         | 192 ± 7%  | 5.978E-12 |
|     | T0MGY4     | Uncharacterized protein                                                                       | NA                      | 188 ± 7%  | 4.293E-15 |
|     | T0M9U1     | Hermansky-Pudlak syndrome 5 protein homolog                                                   | Cellular component      | 174 ± 11% | 6.723E-06 |
|     | P15522     | Glycosylation-dependent cell adhesion molecule 1                                              | Cellular component      | 153 ± 9%  | 1.79E-06  |
|     | T0MHD1     | MHC_I-like_Ag-recog domain-containing protein                                                 | Immune response         | 153 ± 7%  | 1.694E-07 |
|     | Q9GK12     | Peptidoglycan recognition protein 1                                                           | Immune response         | 146 ± 8%  | 1.79E-06  |

|        |                                                                                 |                         |          |           |
|--------|---------------------------------------------------------------------------------|-------------------------|----------|-----------|
| S9X4G0 | Neutrophil gelatinase-associated lipocalin-like protein                         | Binding protein         | 142 ± 2% | 0         |
| S9YK74 | Perilipin                                                                       | Lipid storage regulator | 134 ± 5% | 2.836E-07 |
| S9XYY2 | Hemopexin                                                                       | Binding protein         | 123 ± 3% | 2.774E-10 |
| S9WPL9 | Uncharacterized protein                                                         | Enzyme inhibitor        | 121 ± 3% | 1.62E-07  |
| S9WF76 | Lactadherin                                                                     | Immune response         | 115 ± 2% | 1.378E-11 |
| S9YFK0 | α-Lactalbumin                                                                   | Enzyme                  | 115 ± 2% | 1.479E-08 |
| S9W7K0 | Uncharacterized protein                                                         | Immune response         | 91 ± 2%  | 6.864E-07 |
| S9XI30 | FABP domain-containing protein                                                  | Binding protein         | 83 ± 3%  | 1.496E-07 |
| M1E4K4 | β-Casein                                                                        | Cellular component      | 78 ± 3%  | 1.592E-13 |
| L0P3Z7 | κ-Casein                                                                        | Protein stabilization   | 73 ± 6%  | 2.094E-06 |
| O97944 | α <sub>s2</sub> -Casein                                                         | Cellular component      | 73 ± 5%  | 1.552E-10 |
| W6GH05 | Lactotransferrin                                                                | Immune response         | 70 ± 2%  | 0         |
| S9XP75 | Monocyte differentiation antigen CD14                                           | Immune response         | 70 ± 4%  | 0         |
| S9YGW7 | Heparin cofactor 2                                                              | Cellular component      | 66 ± 8%  | 1.74E-06  |
| Q9GJW6 | Peroxidase                                                                      | Enzyme                  | 60 ± 7%  | 1.935E-11 |
| S9X7Q1 | Lactoperoxidase                                                                 | Enzyme                  | 55 ± 8%  | 6.288E-12 |
| S9WDV3 | Fibrinogen γ chain isoform γ-B                                                  | Binding protein         | 54 ± 6%  | 0         |
| S9Y3W1 | Glucose-regulated protein                                                       | Binding protein         | 54 ± 11% | 1.651E-07 |
| S9XEX5 | Myelin proteolipid protein isoform 2                                            | Cellular component      | 51 ± 5%  | 0         |
| S9YCI6 | Peptidyl-prolyl cis-trans isomerase                                             | Enzyme                  | 48 ± 11% | 1.725E-09 |
| S9XA21 | Uncharacterized protein                                                         | NA                      | 47 ± 7%  | 2.214E-14 |
| T0MIA6 | Gelsolin isoform 32                                                             | Binding protein         | 42 ± 14% | 1.427E-08 |
| S9Z0C4 | Pepsinogen 5, group I (Pepsinogen A)-like protein                               | Enzyme                  | 42 ± 8%  | 0         |
| T0MKQ0 | Complement component C7                                                         | Immune response         | 41 ± 14% | 6.833E-08 |
| S9YTS3 | Actin, cytoplasmic 1                                                            | Binding protein         | 35 ± 7%  | 0         |
| S9Y4T1 | Xanthine dehydrogenase/oxidase                                                  | Enzyme                  | 34 ± 5%  | 0         |
| S9Z0L8 | Amine oxidase                                                                   | Enzyme                  | 15 ± 4%  | 0         |
| S9X2V0 | UDP-Gal:βGlcNAc β 1,4-galactosyltransferase 1, membrane-bound form-like protein | Enzyme                  | 14 ± 7%  | 0         |
| K7DXB9 | α <sub>s1</sub> -Casein                                                         | Cellular component      | 11 ± 19% | 0         |

|     |          |                                                         |                       |           |           |
|-----|----------|---------------------------------------------------------|-----------------------|-----------|-----------|
| SR  | S9X3V4   | TAF domain-containing protein                           | Binding protein       | 305 ± 10% | 0         |
|     | L0P3Z7   | κ-Casein                                                | Protein stabilization | 207 ± 2%  | 0         |
|     | T0MED9   | Uncharacterized protein                                 | Cellular component    | 189 ± 5%  | 0         |
|     | P15522   | Glycosylation-dependent cell adhesion molecule 1        | Cellular component    | 176 ± 7%  | 3.95E-15  |
|     | T0MGY4   | Uncharacterized protein                                 | NA                    | 167 ± 8%  | 4.272E-09 |
|     | S9X1L5   | Lipoprotein lipase isoform 3                            | Enzyme                | 164 ± 5%  | 0         |
|     | S9XC74   | Osteopontin                                             | Cell adhesion         | 138 ± 5%  | 4.513E-10 |
|     | P15522-2 | Glycosylation-dependent cell adhesion molecule 1        | Cellular component    | 135 ± 3%  | 0         |
|     | T0M5F7   | Uncharacterized protein                                 | NA                    | 134 ± 5%  | 4.272E-09 |
|     | S9X4G0   | Neutrophil gelatinase-associated lipocalin-like protein | Binding protein       | 133 ± 3%  | 0         |
|     | O97944   | α <sub>s2</sub> -Casein                                 | Cellular component    | 126 ± 3%  | 1.205E-11 |
|     | S9XGH7   | Polyubiquitin-B                                         | Binding protein       | 121 ± 3%  | 2.282E-11 |
|     | T0M664   | Zinc-α-2-glycoprotein-like protein                      | Binding protein       | 119 ± 3%  | 9.939E-07 |
|     | M1E4K4   | β-Casein                                                | Cellular component    | 116 ± 1%  | 0         |
|     | S9WPL9   | Uncharacterized protein                                 | Enzyme inhibitor      | 113 ± 2%  | 3.526E-08 |
|     | S9YFK0   | α-Lactalbumin                                           | Enzyme                | 108 ± 2%  | 1.765E-06 |
|     | S9WBY0   | Clusterin                                               | Binding protein       | 91 ± 2%   | 2.651E-06 |
|     | S9Z0L8   | Amine oxidase                                           | Enzyme                | 89 ± 2%   | 5.906E-07 |
|     | S9WF76   | Lactadherin                                             | Immune response       | 86 ± 3%   | 8.764E-07 |
|     | S9WI87   | Serum albumin                                           | Cellular component    | 84 ± 2%   | 0         |
|     | S9YD38   | Complement factor B                                     | Enzyme                | 83 ± 3%   | 9.256E-09 |
|     | S9XI30   | FABP domain-containing protein                          | Binding protein       | 83 ± 3%   | 9.13E-08  |
|     | W6GH05   | Lactotransferrin                                        | Immune response       | 82 ± 2%   | 0         |
|     | T0NN97   | Uncharacterized protein                                 | Enzyme inhibitor      | 81 ± 2%   | 0         |
|     | S9YNY9   | Nucleobindin-1                                          | Binding protein       | 80 ± 2%   | 0         |
|     | Q9GJW6   | Peroxidase                                              | Enzyme                | 72 ± 3%   | 0         |
|     | S9WYL2   | Serine carboxypeptidase CPVL                            | Enzyme                | 65 ± 8%   | 7.266E-07 |
|     | S9X7Q1   | Lactoperoxidase                                         | Enzyme                | 63 ± 5%   | 0         |
|     | S9Y2X0   | Platelet glycoprotein 4                                 | Immune response       | 47 ± 5%   | 0         |
|     | K7DXB9   | α <sub>s1</sub> -Casein                                 | Cellular component    | 47 ± 11%  | 1.688E-11 |
|     | S9XEX5   | Myelin proteolipid protein isoform 2                    | Cellular component    | 13 ± 4%   | 1.42E-07  |
| SSD | S9X3V4   | TAF domain-containing protein                           | Binding protein       | 570 ± 9%  | 0         |

|     |          |                                                         |                       |           |           |
|-----|----------|---------------------------------------------------------|-----------------------|-----------|-----------|
|     | T0MED9   | Uncharacterized protein                                 | Cellular component    | 227 ± 5%  | 0         |
|     | L0P3Z7   | κ-Casein                                                | Protein stabilization | 208 ± 2%  | 0         |
|     | T0MGY4   | Uncharacterized protein                                 | NA                    | 187 ± 8%  | 2.39E-13  |
|     | O97944   | α <sub>s2</sub> -Casein                                 | Cellular component    | 170 ± 3%  | 0         |
|     | S9X1L5   | Lipoprotein lipase isoform 3                            | Enzyme                | 169 ± 5%  | 0         |
|     | P15522-2 | Glycosylation-dependent cell adhesion molecule 1        | Cellular component    | 141 ± 3%  | 0         |
|     | T0M664   | Zinc-α-2-glycoprotein-like protein                      | Binding protein       | 139 ± 3%  | 0         |
|     | S9X4G0   | Neutrophil gelatinase-associated lipocalin-like protein | Binding protein       | 134 ± 3%  | 0         |
|     | S9XC74   | Osteopontin                                             | Cell adhesion         | 131 ± 5%  | 1.334E-08 |
|     | M1E4K4   | β-Casein                                                | Cellular component    | 123 ± 1%  | 0         |
|     | S9W7K0   | Uncharacterized protein                                 | Immune response       | 121 ± 3%  | 8.244E-08 |
|     | S9XE13   | Uncharacterized protein                                 | Cellular component    | 119 ± 3%  | 7.017E-08 |
|     | S9Y4T1   | Xanthine dehydrogenase/oxidase                          | Enzyme                | 111 ± 2%  | 3.611E-08 |
|     | S9WPL9   | Uncharacterized protein                                 | Enzyme inhibitor      | 111 ± 2%  | 2.66E-06  |
|     | S9YFK0   | α-Lactalbumin                                           | Enzyme                | 91 ± 2%   | 5.864E-08 |
|     | S9XDK9   | Complement C3                                           | Enzyme inhibitor      | 90 ± 2%   | 5.481E-08 |
|     | S9Z108   | Plasma protease C1 inhibitor                            | Enzyme inhibitor      | 88 ± 2%   | 7.355E-09 |
|     | S9WI87   | Serum albumin                                           | Cellular component    | 84 ± 2%   | 0         |
|     | W6GH05   | Lactotransferrin                                        | Immune response       | 83 ± 2%   | 0         |
|     | S9XCM5   | Uncharacterized protein                                 | Binding protein       | 81 ± 3%   | 1.104E-13 |
|     | Q9GJW6   | Peroxidase                                              | Enzyme                | 78 ± 3%   | 0         |
|     | S9X7Q1   | Lactoperoxidase                                         | Enzyme                | 68 ± 4%   | 5.89E-14  |
|     | S9Y2X0   | Platelet glycoprotein 4                                 | Immune response       | 61 ± 4%   | 0         |
|     | S9X0W6   | Ig-like domain-containing protein                       | Immune response       | 18 ± 12%  | 1.201E-09 |
| SRO | S9X9X0   | Vitelline membrane outer layer protein 1-like protein   | Cellular component    | 373 ± 16% | 2.09E-12  |
|     | T0MII3   | α-2-Macroglobulin-like protein                          | Enzyme inhibitor      | 331 ± 4%  | 0         |
|     | S9X3V4   | TAF domain-containing protein                           | Binding protein       | 257 ± 12% | 3.055E-10 |
|     | T0MED9   | Uncharacterized protein                                 | Cellular component    | 177 ± 9%  | 6.018E-10 |
|     | S9XGH7   | Polyubiquitin-B                                         | Binding protein       | 167 ± 8%  | 9.267E-08 |
|     | T0MGY4   | Uncharacterized protein                                 | NA                    | 167 ± 8%  | 2.29E-09  |

|        |                                                                                 |                    |           |           |
|--------|---------------------------------------------------------------------------------|--------------------|-----------|-----------|
| P15522 | Glycosylation-dependent cell adhesion molecule 1                                | Cellular component | 165 ± 10% | 1.141E-06 |
| S9XSQ6 | Vitamin D-binding protein-like protein                                          | Binding protein    | 132 ± 4%  | 4.739E-12 |
| T0NN97 | Uncharacterized protein                                                         | Enzyme inhibitor   | 125 ± 3%  | 2.909E-14 |
| S9X4G0 | Neutrophil gelatinase-associated lipocalin-like protein                         | Binding protein    | 121 ± 3%  | 8.183E-12 |
| S9XYY2 | Hemopexin                                                                       | Binding protein    | 120 ± 3%  | 6.129E-08 |
| S9WF76 | Lactadherin                                                                     | Immune response    | 115 ± 2%  | 7.552E-10 |
| S9XCM5 | Uncharacterized protein                                                         | Binding protein    | 78 ± 2%   | 0         |
| S9YL21 | Apolipoprotein A-I                                                              | Binding protein    | 72 ± 5%   | 8.374E-11 |
| S9X7Q1 | Lactoperoxidase                                                                 | Enzyme             | 62 ± 8%   | 2.386E-08 |
| S9Y4T1 | Xanthine dehydrogenase/oxidase                                                  | Enzyme             | 61 ± 4%   | 0         |
| S9XA21 | Uncharacterized protein                                                         | NA                 | 61 ± 8%   | 6.097E-08 |
| S9Z0C4 | Pepsinogen 5, group I (Pepsinogen A)-like protein                               | Enzyme             | 57 ± 7%   | 2.644E-14 |
| W6GH05 | Lactotransferrin                                                                | Immune response    | 56 ± 2%   | 0         |
| S9XEX5 | Myelin proteolipid protein isoform 2                                            | Cellular component | 56 ± 5%   | 0         |
| S9YTS3 | Actin, cytoplasmic 1                                                            | Binding protein    | 48 ± 10%  | 2.593E-12 |
| T0MIA6 | Gelsolin isoform 32                                                             | Binding protein    | 40 ± 18%  | 1.207E-06 |
| S9YCI6 | Peptidyl-prolyl cis-trans isomerase                                             | Enzyme             | 38 ± 14%  | 3.501E-10 |
| S9Z0L8 | Amine oxidase                                                                   | Enzyme             | 25 ± 4%   | 0         |
| S9X2V0 | UDP-Gal:βGlcNAc β 1,4-galactosyltransferase 1, membrane-bound form-like protein | Enzyme             | 23 ± 6%   | 0         |
| K7DXB9 | α <sub>s1</sub> -Casein                                                         | Cellular component | 10 ± 21%  | 0         |

FR, freeze-dried raw milk powder; FSD, spray dewatering-concentrated / freeze-dried milk powder; FRO, reverse osmosis-concentrated / freeze-dried milk powder; SR, spray-dried raw milk powder; SSD, spray dewatering-concentrated / spray-dried milk powder; SRO, reverse osmosis-concentrated / spray-dried milk powder.
